# Supplementary material for: Sarcopenia is associated with chemoradiotherapy discontinuation and reduced progression-free survival in glioblastoma patients
Source: Springer Nature journal article supplement (doi:10.1007/s00066-024-02225-7), 2024-03-28
Supplement: MOESM1 [file 26917222]

### Supplementary Figure 1: Inclusion and exclusion criteria for the study population.

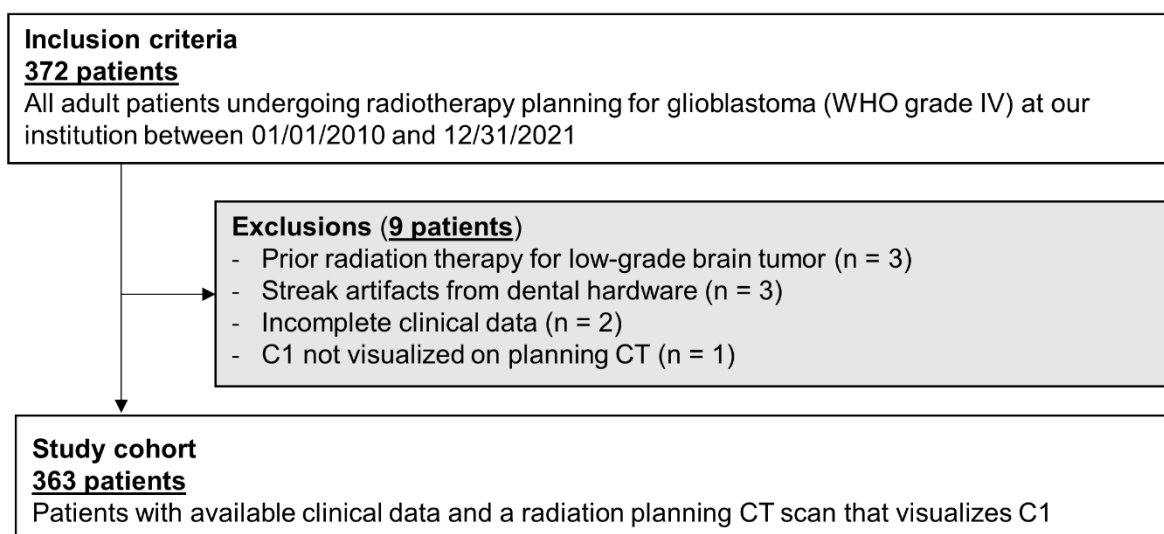

### Supplementary Figure 2: Overall survival (OS) in sarcopenic and non-sarcopenic patients in univariable analyses. Sarcopenic patients showed a reduced OS compared to non-sarcopenic patients in log-rank analyses ( $p < 0.001$ ) and Kaplan Meier plots.

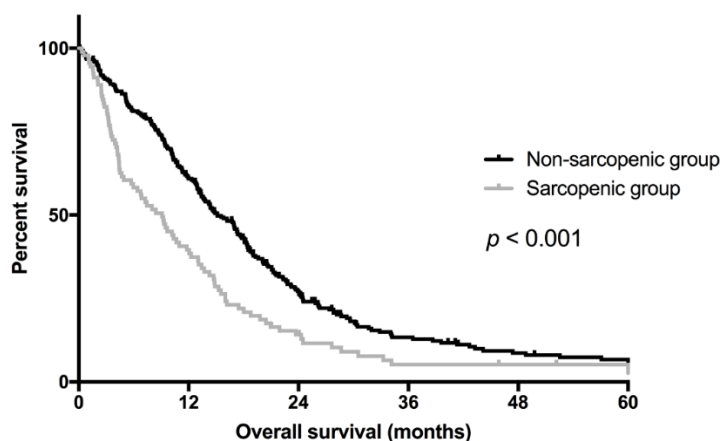

| Number at risk       | 0   | 12  | 24 | 36 | 48 | 60 |
|----------------------|-----|-----|----|----|----|----|
| Non-sarcopenic group | 272 | 162 | 62 | 25 | 14 | 10 |
| Sarcopenic group     | 91  | 36  | 12 | 4  | 3  | 2  |

### Supplementary Table 1: Choice of agent among patients treated with concomitant chemotherapy. There was no difference between the sarcopenic and the non-sarcopenic group.

| Choice of agent among patients treated with concomitant chemotherapy, n (%) | All (n = 363) | Sarcopenic group (n = 91) | Non-sarcopenic group (n = 272) | p value |
|-----------------------------------------------------------------------------|---------------|---------------------------|--------------------------------|---------|
| Temozolomide (according to Stupp et al.)                                    | 269 (81.7)    | 63 (86.3)                 | 206 (80.5)                     | 0.20    |
| Temozolomide and lomustine (CCNU) (according to Herrlinger et al.)          | 47 (14.3)     | 6 (8.2)                   | 41 (16.0)                      |         |
| Other                                                                       | 13 (4.0)      | 4 (5.5)                   | 9 (3.5)                        |         |

**Supplementary Table 2: Multivariable Cox proportional hazard regression of progression-free survival (PFS) in glioblastoma patients, restricted to patients that completed standard chemoradiotherapy.** PFS was defined as the interval from first diagnosis to progression or death, whichever occurred first. Tumor size was segmented based on contrast enhancing lesions on T1-weighted MRI scans; the laterality and number of lesions was assessed similarly. The Charlson Comorbidity Index (CCI) is as a combination score of age and comorbidities. Two models for different muscle measures were calculated in different models, Model A (assessing dichotomized muscle measurements as sarcopenic or non-sarcopenic), and Model B (assessing continuous muscle measurements at the level of the first cervical vertebra in cm<sup>2</sup>). Standard chemoradiotherapy completion was defined as application of 60 Gy in 2 Gy fractions to the tumor region with concomitant application of chemotherapy. Analyses were performed in n = 303 patients.

|                                                           | Sarcopenic group vs. Non-sarcopenic group |                  | C1 muscle area (cm <sup>2</sup> ) |                  |
|-----------------------------------------------------------|-------------------------------------------|------------------|-----------------------------------|------------------|
|                                                           | HR (CI)                                   | <i>p</i>         | HR (CI)                           | <i>p</i>         |
| <b>Muscle measurement</b>                                 |                                           |                  |                                   |                  |
| <b>Model A:</b> Non-sarcopenic group vs. sarcopenic group | 0.65 (0.47-0.89)                          | <b>0.008</b>     |                                   |                  |
| <b>Model B:</b> C1 muscle area (cm <sup>2</sup> )         |                                           |                  | 0.97 (0.94-0.99)                  | <b>0.007</b>     |
| <b>Body mass index, kg/m<sup>2</sup></b>                  | 1.04 (1.02-1.07)                          | <b>&lt;0.001</b> | 1.05 (1.03-1.08)                  | <b>&lt;0.001</b> |
| <b>Sex</b>                                                |                                           |                  |                                   |                  |
| Female                                                    | Ref 1.00                                  |                  | Ref 1.00                          |                  |
| Male                                                      | 1.10 (0.85-1.43)                          | 0.45             | 1.52 (1.06-2.16)                  | <b>0.022</b>     |
| <b>Charlson Comorbidity Index, points</b>                 | 1.07 (0.98-1.16)                          | 0.14             | 1.07 (0.98-1.16)                  | 0.14             |
| <b>ECOG Score</b>                                         |                                           |                  |                                   |                  |
| 0-1                                                       | Ref 1.00                                  |                  | Ref 1.00                          |                  |
| ≥2                                                        | 1.22 (0.90-1.66)                          | 0.19             | 1.20 (0.88-1.62)                  | 0.25             |
| <b>Tumor size at time of diagnosis, cm<sup>3</sup></b>    | 1.00 (0.99-1.00)                          | 0.082            | 1.00 (0.99-1.00)                  | 0.078            |
| <b>Number of lesions at time of diagnosis</b>             |                                           |                  |                                   |                  |
| 1                                                         | Ref. 1.00                                 |                  | Ref 1.00                          |                  |
| 2 or more                                                 | 1.35 (0.99-1.85)                          | 0.061            | 1.36 (0.99-1.86)                  | 0.059            |
| <b>Tumor extent</b>                                       |                                           |                  |                                   |                  |
| Unilateral                                                | Ref 1.00                                  |                  | Ref 1.00                          |                  |
| Bilateral                                                 | 3.20 (2.11-4.86)                          | <b>&lt;0.001</b> | 3.16 (2.08-4.81)                  | <b>&lt;0.001</b> |
| <b>MGMT methylation status</b>                            |                                           |                  |                                   |                  |
| Un-methylated                                             | Ref 1.00                                  |                  | Ref 1.00                          |                  |
| Methylated                                                | 0.52 (0.40-0.67)                          | <b>&lt;0.001</b> | 0.53 (0.41-0.69)                  | <b>&lt;0.001</b> |
| <b>Extent of resection</b>                                |                                           |                  |                                   |                  |
| Gross total resection (GTR); >95% resected                | Ref 1.00                                  |                  | Ref 1.00                          |                  |
| Subtotal resection (STR); >5% and <95% resected           | 1.20 (0.92-1.56)                          | 0.19             | 1.21 (0.93-1.58)                  | 0.16             |
| Biopsy                                                    | 1.78 (1.14-2.78)                          | <b>0.012</b>     | 1.83 (1.17-2.86)                  | <b>0.009</b>     |

CI: confidence interval. ECOG: Eastern Cooperative Oncology Group. HR: Hazard ratio. MGMT: O6-Methylguanine-DNA Methyltransferase. Ref.: Reference (reference group in group-based comparisons).

**Supplementary Table 3: Multivariable Cox proportional hazard regression of overall survival (OS) in glioblastoma patients.** Tumor size was segmented based on contrast enhancing lesions on T1-weighted MRI scans; the laterality and number of lesions was assessed similarly. The Charlson Comorbidity Index (CCI) is as a combination score of age and comorbidities. Analyses were performed in n = 363 patients.

|                                                        | Sarcopenic group vs. Non-sarcopenic group |                  |
|--------------------------------------------------------|-------------------------------------------|------------------|
|                                                        | HR (CI)                                   | <i>p</i>         |
| <b>Muscle measurement</b>                              |                                           |                  |
| Sarcopenic group                                       | Ref. 1.00                                 |                  |
| Non-sarcopenic group                                   | 0.64 (0.49-0.85)                          | <b>0.002</b>     |
| <b>Body mass index, kg/m<sup>2</sup></b>               | 1.04 (1.01-1.06)                          | <b>0.001</b>     |
| <b>Sex</b>                                             |                                           |                  |
| Female                                                 | Ref 1.00                                  |                  |
| Male                                                   | 1.16 (0.92-1.46)                          | 0.22             |
| <b>Charlson Comorbidity Index, points</b>              | 1.12 (1.05-1.19)                          | <b>&lt;0.001</b> |
| <b>ECOG Score</b>                                      |                                           |                  |
| 0-1                                                    | Ref 1.00                                  |                  |
| ≥2                                                     | 1.46 (1.12-1.89)                          | <b>0.004</b>     |
| <b>Tumor size at time of diagnosis, cm<sup>3</sup></b> | 1.00 (0.99-1.00)                          | 0.54             |
| <b>Number of lesions at time of diagnosis</b>          |                                           |                  |
| 1                                                      | Ref. 1.00                                 |                  |
| 2 or more                                              | 1.27 (0.95-1.70)                          | 0.10             |
| <b>Tumor extent</b>                                    |                                           |                  |
| Unilateral                                             | Ref 1.00                                  |                  |
| Bilateral                                              | 2.01 (1.42-2.86)                          | <b>&lt;0.001</b> |
| <b>MGMT methylation status</b>                         |                                           |                  |
| Un-methylated                                          | Ref 1.00                                  |                  |
| Methylated                                             | 0.60 (0.48-0.75)                          | <b>&lt;0.001</b> |
| <b>Extent of resection</b>                             |                                           |                  |
| Gross total resection (GTR); >95% resected             | Ref 1.00                                  |                  |
| Subtotal resection (STR); >5% and <95% resected        | 1.21 (0.94-1.57)                          | 0.14             |
| Biopsy                                                 | 2.33 (1.62-3.35)                          | <b>&lt;0.001</b> |

CI: confidence interval. ECOG: Eastern Cooperative Oncology Group. HR: Hazard ratio. MGMT: O6-Methylguanine-DNA Methyltransferase. Ref.: Reference (reference group in group-based comparisons).
